# Supplementary material for: Highly dispersed nanostructured platinum catalysts for the oxygen reduction reaction: the roles of the platinum precursor and the synthesis conditions
Source: Royal Society of Chemistry journal article supplement (doi:10.1039/d5nj00242g), 2025-01-01
Supplement: d5nj00242g1.pdf [file d5nj00242g1.pdf]

## Supplementary Information

### Highly dispersed nanostructured platinum catalyst for oxygen reduction reaction. The roles of the platinum precursor and the synthesis conditions

Anna Prytkova,<sup>a</sup> Vasiliy Brusko,<sup>a</sup> Maria Kirsanova,<sup>b</sup> Igor Yanilkin,<sup>c</sup> and Ayrat M. Dimiev<sup>a,d\*</sup>

<sup>a</sup>Laboratory “Materials for Green Energy and Sustainability”, Kazan Federal University, Kremlevskaya st. 18, Kazan, Russian Federation, 420008

<sup>b</sup>Advanced Imaging Core Facility, Skolkovo Institute of Science and Technology, Moscow, Russian Federation, 121205

<sup>c</sup>Institute of Physics, Kazan Federal University, Kremlevskaya st. 18, Kazan, Russian Federation, 420008

<sup>d</sup>Department of Chemistry, Rice University, 6100, Main St., Houston, TX 77005, USA

\*Corresponding author: E-mail: [dimiev.labs@gmail.com](mailto:dimiev.labs@gmail.com) (Ayrat Dimiev)

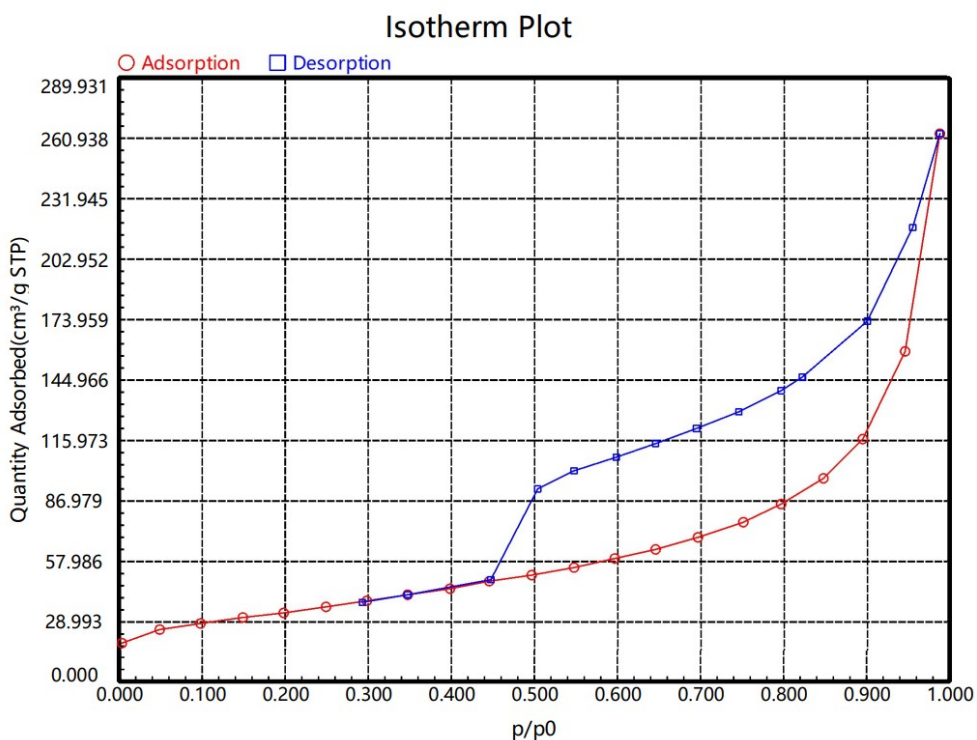

**Fig. S1. Nitrogen adsorption–desorption isotherms for the annealed GO support**

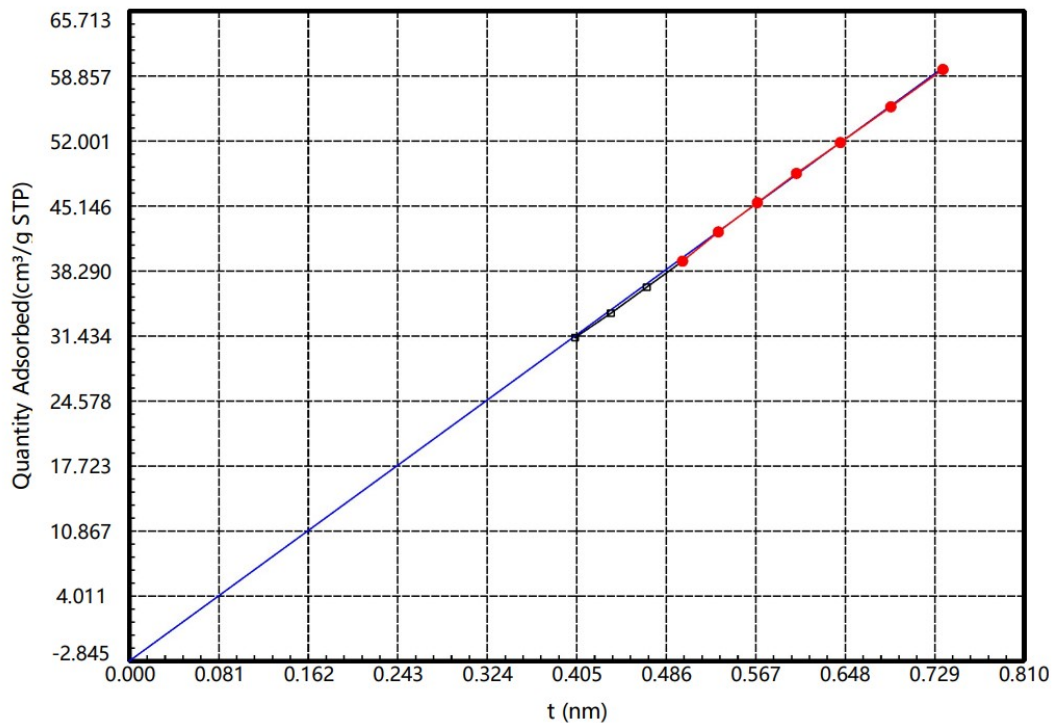

**Fig. S2. Pore diameter distribution for the annealed GO support**

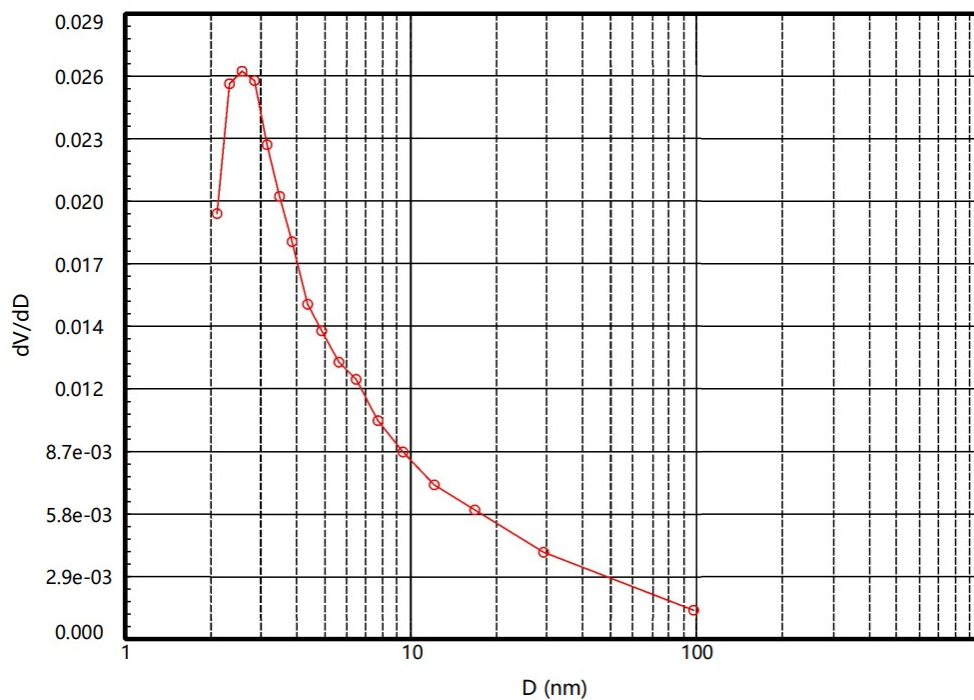

**Fig. S3. Pore volume distribution for the annealed GO support.**

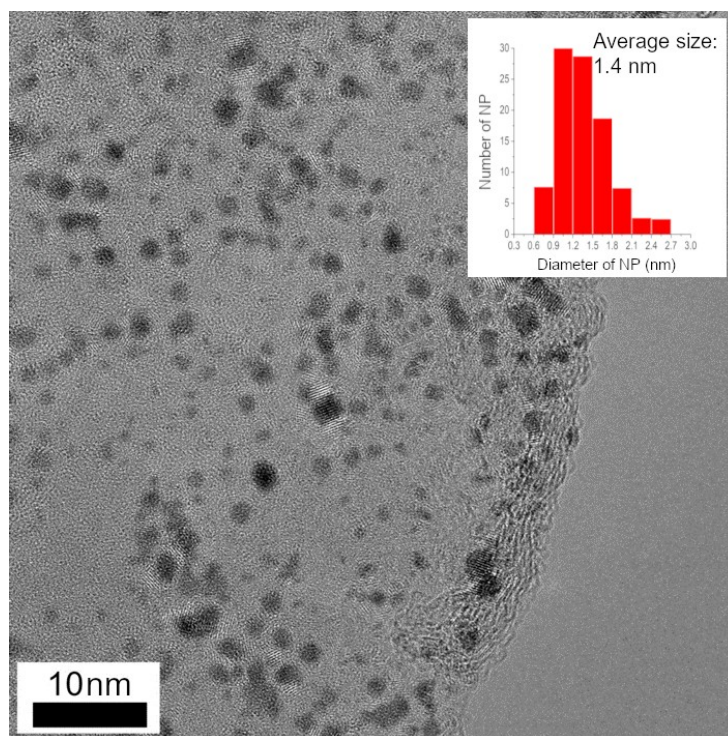

**Fig. S4. BF-TEM image of Pt/anGO-IPA and nanoparticle (NP) size distribution diagram**

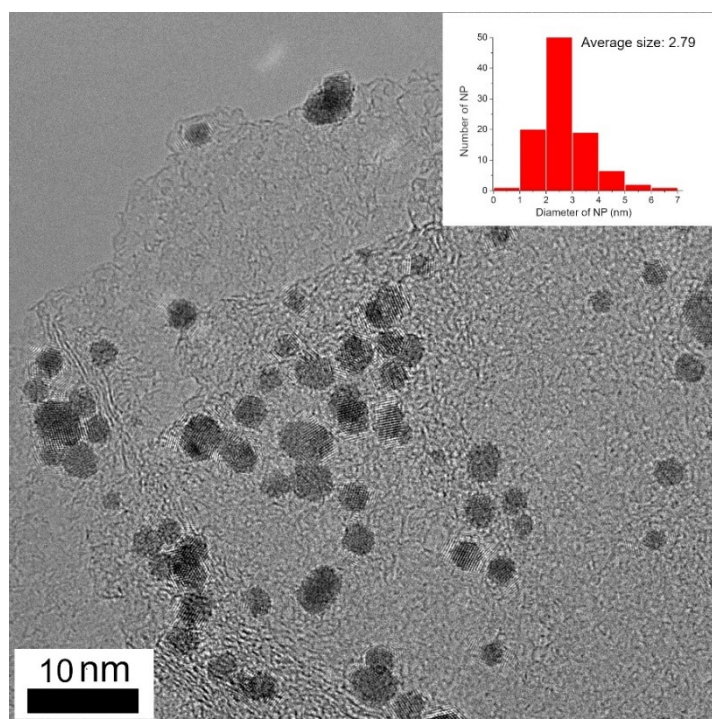

**Fig. S5. BF-TEM image of Pt/anGO-EG and nanoparticle (NP) size distribution diagram**



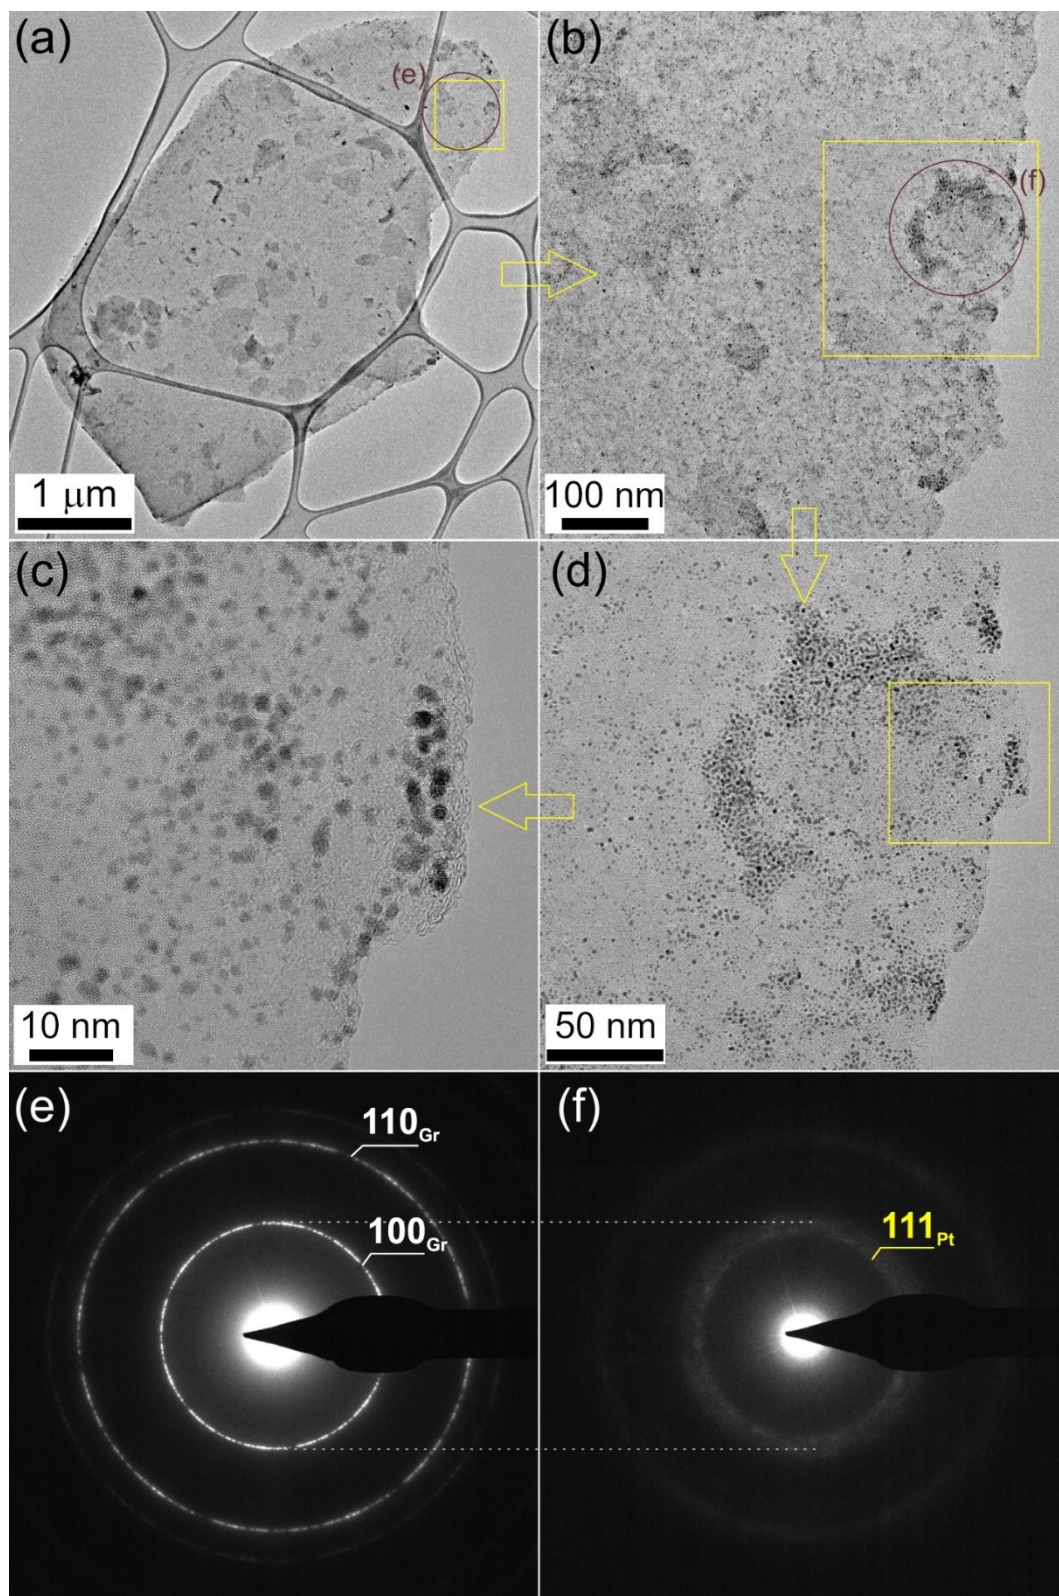

**Fig. S6.** A series of BF-TEM images (a-d) of Pt/anGO-IPA and SAED patterns obtained from groups of nanoparticles circled by brown circles in panels (a) and (b).
